# Supplementary material
Source: publisher figshare collection journal article supplement (https://gsajournals.figshare.com/ndownloader/files/12404648)
Supplement: Supplementary file 1 [file 12404648]

## Sheet: Sheet1
Table S2
gene name	Forward	Reverse
CG42669	TGCTGGAGGCCGACTATAA	CTTGGCTTTCAGGGCATAGTAA
CG13350	TCACAAAGCGGCCCAAA	GGATCCAAAGATGACTCCAGTG
CG13151	TTCCTCACACAGCAGAGATTAC	CCGTACCGACTAGCCAAATTA
CG5094	GGACAACGAGGTGTACAAGAG	CCAGGATTTGCGTTCGAATTG
CG42748	TTCGCTTCAGCGGCTAAATA	GTCGTCGACCCACATGAATAG
CG5245	CCTGCAAGAGCATACTGGAA	TCCGATTTAGTGCCGCATAG
CG14184	CCAGGAGTACGCCGATAGAATA	CTGTATGTGCGAGACACTGATG
PP2A-B	GTCGATTTCCTCACCAACCA	CGCAAGAACAGCTCGTAAAC
RhoGAP1A	CAACGAATCCACACGAATCAAC	ATTCCTGCCTGAGCCATAAC
CG5880	CTCCAGCAACAACGCATTTAT	CCTCGAAGGGAGCATCATTTA
CG8209	CTTCTCTCTGATGACCACCTTTC	GCGTCTTGGTCATGGTGAT
SET domain binding factor	GTACAAACGTGGCGCATTAC	GATCCATTCCTGTGCCAGAT
CG1647	GGAGCAGCAACTGGCTATAA	CTCGGCGATTTCGTTGATATTG
dikar	TTCCGGCTACTGGTACTTCTA	GCGTTCGTCGAGGTCTTAAA
CG4912	GACGAATGGAGTGTCGAAAGA	GCGGATTTCCGTCTCCATAA
bin3	GCTCGCATACTCCGGTATTT	ACCGCATCGTGGTGATTT
FKBP59	CGAAATTGCCCTGGAGAAGA	CTTCACCTCCTCATTGGTATGG
RhoGAP92B	TCTGACCAAGCTGCCAAAGGAGAA	TGTGGTCGGTGCGAAGTCTGTGAT
Gadd45	CATCAAGTCGGCCCTTCTAA	CCACCTTGATCACGTAGATGTC
CG10011	GACACGAGCAGTTTGCATAAG	CCTTGAGGTTGCCCAGAATA
CG5384	TGAACCCAACGAAGAGAAGAAG	GGGCGCATATAACAGGACATAG
cnx99a	CCAAGAAGTCCGACGATCC	CCTTGGACTCCTCTTCGTTATC
Jafrac2	CTGCGACAGATCACCATGAA	GCAAAGTACTTCGTCTTCTCCT
XNP	GCTTCCGCTCGGACATATT	GGATTCTGGTTGGCGTAGAG
pod1	CTGTTACGAAATCACCGACGAG	GGAACAGATCGTCTTGGAACAG
Aut1	GTGACTCTGTGCTCCATACAC	CCATATTGGGACCTGGAAGATG
vir-1	TTGTGCCCATTGACCTATCC	TTTCGCAGGCTCTCCTAAAG
eIF-4G2	CCACTACTGCGACTGTGTATC	CGAATGTGCCATCTCTAGCTTA
CG14446	GCCTGAGTACAGGAGATCATTG	CTCCATCGTAGGCATCGAAT
groucho	TCATGCATCGACATCAGTCC	CGGTGGAAACGAACCATTTG
Larp	CGGCTACAATCAGCAGCAAA	CTGTCTGTGATCCTGCTCCT
eIF-4B	CCCGAGAAGAGACATCCAAAG	CAACTCCCTTGCTGCTGTAT
Med1	CCACCTCCAATTCCTCCATTA	CGACTGACTTCATCTGCTGTT
nocte	CCACCGCATCACAAGAACTA	CGGTCACCTGTCGCATATT
pglym78	GACTCACTGGCCTGAACAA	ATGATGGCGTCCTCAGAAAG
CG18259	GCTGCTCCATCGAAGAACAA	TGATAGGTATCTACGGCCTTCTC
Ptp61F	CGGCATCGATCCAATTCCA	CTAGCTTCGTGTATGCGTAGG
smn	CCTTATCGCCAAGAAGGATGAG	CCTGGTAGAGGCCCGTATAA
bancal	ATTCGGAGGTGGTAGCTTTG	CACTCAGTCCGTTACCCAATC
lark	GCTATCAGACCTCGCGAATG	CTAAAGTCCTCGTAACCGTGTG
SF2	ATCGTGGCAAGATCTCAAGG	CTCTGTCGTTATCACCGCTATC
CG32626	AGTGTGATGATGAGCGGATTC	TGGCGTTCATGTCTGCAA
Hsc/Hsp70-interacting protein related	GCACGTAAGGAGCAGGAAA	CCGGGCACAATCTTCTTGATA
CG10083	TATTGACTTGGATCGGCTTCTC	CGCTCGTGTGCTTTGTAAAC
CG1804	CAGCAGCAACAGCAGATACA	AGATTGGATCCACCTAGTCCTC
pms2	TCGCCCGCATGGAAATAA	CTGCTAAGAGCTGTACCAATCA
Akap200	CACTGCCACCGAAGAAGTT	TGCCATTGGTGCCATTCT
CG9705	TACACCACAACAGCCATAGTC	GCCTGGTGCTTCTCATACTT
CG6509	CCACTGCATCCTTGACGTTT	GTGCCAAAGTCGCGAATATCT
prosalpha6	CGCACCTATCTGGAGAAGAAT	ATCATCGTCATCGTCGTTCC
CG30115	GTGGAGGATAGCTTGGAGAATG	AATCTGTGGTGGCTGATGG
CG3511	GAAGCGATTTCAAAGACGAGTTC	AAATGTTGAGAACCACCTCCA
alhambra	CTAGCCATCGTTAAGTCCTCTG	CCGCCTGTAATGTTGCTATTG
CG13907	CATCATTGGCATCACCAACAC	AGGAGGTCGACCAGGATAAT
scny	ATGGGAGCACCATCAATGAG	CTGGAAGTTCTGGCGATAGTT
FWD	GCTCGAAAGCATATGGATCGTA	CCGTCGTACAGTTTGGTTGA
CG18659	ACGTACAATCTCCACCGATTC	GGCGGATCAGACACATTAAGA
srp54	AGAAGCACTCTTCACGTTCTC	GTCCGACTTCTCGACACTAAC
Hsc70Cb	CAGAAGACGGATCCCATCAA	CGAACTGACGCACGAATTTAG
rudimentary	CGGCGTCAAGCAGTTATTTG	GCAAGGCCATACGGATGTA
hemomucin	AAGAAGCCAACGACCACTAC	CGCTTGACCTTCGGTTTAGA
aatf	GTTCACCAGCAAAGCGAATC	GGTCGTCCCACTTTAACAGAA
CG10588	GAGCCATTTAACGAAGGAGGA	CTTGAAGGATCATCGCTCTCTC
rok	GAGTTCGTTCACATTACCTACCA	TTGTACGAAGCCGCCTTATATC
rasputin	TACAACAACAGCAACGGCAACTCG	GTTGTTCAGGTTGTTGCCACCGAT
ZnT35C	CACATCGGCGGTTCATTT	CTACTTCTCGGGCACATTG
CG10101	GCAGGGAGCTGAAAGGATAAT	CTCTGCTTGCGAGGTCTTAAA
Pkn	GGATGCGGAGGATGTTAAGAA	AAGTCCTGGAAGAGCAACTG
Hsp26	AGTGAGCTCAACGTGAAGG	GGTCCCACTTGCTGAATTTG
CG9727	GGGAAGGATCTACGTCCAATAAC	AGTATGCCTGTGACACCAATC
Apc	CCTCGAAGTTACCCACAAAGA	TCTTCCAGATGTTGGCGATAC
bab1	CCAGTGTCTCATCTTCCTCATC	TTACTCGCTAGTGGTGGTAATG
CG10417	AGTCCACCATTCCTCCAAATC	CTTCTGGGTAGGGTCTTCATTC
PP2A-29B	CTTGCTTGTTCTGCCTGAATG	GTCGAGTGTGGGCTTTACTT
Df31	GTCTGAGCCCACTGTTTCTT	TCATCCACCTTCCGCTTTAC
Gp93	GTCCGAGAAGAGCAAGAAGAA	GAAGTCTCCTGGAGCATGTATC
Mbs	GCAATGTGGATCGTCAGGATAA	CAGTTTAGTGGGCGTCTTCTC
CG18190	CGTTGGCAAAGCCCATAAAG	GACGGGTTCCTCGTTGATTT
Jarid2	AAAGTGCAGGCGGAGAAA	CTCCTGCAGTTGCCGTATAA
CG7597	AAATGGCGCAGCTTGAAAC	GCGCTTGTCCGGATCTAAA
knk	CCCGCCTTTCACACTTACTATC	CACCGGCTAATACACGAATCTC
mus101	GACGAAACGCTGTACGAATG	CTTTGGAGAACGGAGTTGTTG
5-HT1A	TGATTGTGTCCTTGGCACCACAGT	TTTCCAGTACAACGCCAGGATGAC
14-3-3zeta	CTACAAGGACTCGACACTCATC	ACCTGTAGTAATCACCCTTCATC
CG32206	ATTGCAGCAGCCCTGAC	CTTCTTCAAGGTACCGATGCT
CG34356	CTATCGGACAACACGCTGAT	TGCTGGATGATAGCAGGAATG
CG5527	GGATAACTCGGTGTACGTGATG	GCTATGTTCTCGTCCCTTGTC
BarH1	TCGCTGAGCAGCTACTATCA	AACAGCTGTCAACGGATCG
ACXD	CGACATCCTGAATCCGATCTAC	CCCTCATCAGGCGAAAGAAA
CG8909	CATACGAAGAAGAGCGATCAGG	CGTTGTAGTTTGGATTTGAGAAGG
Rpn13	ACCTGTGATCAAGCAATTC	CGGGATCTGTGTTCTCATC
Sodh-1	GTGCGTCTGAGATCCTCATT	GACGCTTAACATTCACCTTTCC
CG30101	GCCATACGAGGTGATCAAGAA	GCTTCTCGACGGTATAAGGAAC
mtd	TCCGTTCTCTGAAGCAACTG	GTAGGCGTATGTGGGTGTATG
CG4968	CCCGATGGCAATTGTTTCTTC	GGATGTGATCCGATTCCTTGT
Nap1	ATTTCTTCAGCCCACCAGAG	GCTTCTTGATACCGGCTGAT
RhoGAP68	GTGGACTCGCTGTCCATAAC	GGAGGTCATCTTGTTCAGATCC
CG7565	GACGGATTCCGATGTCCTTT	TCCACTGCCTCCACTACTT
CG9601	GCTGCCTTGTGATGAATGTG	GGCTTAAAGTTCACCTTGTGT
CG2774	TGGTTCGACGACAAGATCAC	ACTCGGCCAGAATGAAGAAG
Eps-15	CAACAAGAGCAACGCCATTAC	AAAGTCGGCAAATCCTCCTC
CG11414	GCCAAACCGAAGGAGAGAAATA	GGTCTTGAGCAGGGACATAAC
smg6	CTACCGGATACCAACTGCTTTAT	CGGTTGTAATGAGCACCAATTC
CG10103	GCACATCATTAGGGAGGACTAC	GTCAGCTTGTGCATGAGTTTC
CG11395	TTACGAAACTGCGGGATCTG	CTTGGGATCCAGGTTGAAGAG
Hsp27	AAAGATGGCTTCCAGGTGTG	CGTTTGCTGGATCTGGACAAT
alphabet	CATCGCCAATTGTGGTGATTC	CACTGCCAGGGTACCATTTA
Vulcan	GTGGAGCACGTGGATTCTATTT	TAAAGCTGCTGCCGAGTTAG
CG5921	GCACAAGCAGATGAACAAGAC	GGAATTAACCGGCCTCAGAT
CG14749	TCATTAGTCAAGGGCGAAAGG	CCAGCTGAGGCATGTAGATATT
Spindly	GGTACAGTAACGCCTGCTAAA	CATCTCTCAAGCGGACTCAAA
shot	TCAGCAGACAGGGATCAAAG	GTGGTGGTCACCGAAAGT
nclb	AACTGCTGTGGTCCGTAAAG	CGGCTATCGAGTTCTTGATGTT
Cct5	TGTGAAGGACTCGCGTATTG	ATCTGCTGCTTCTTCGAGTG
Su(var)205	CCAAGGCCAAGGAAACTCAA	GAATGTCAGGCGGCCATTAT
inaD	TCCACACCACATACGAGAAAGC	AGGCATCGCCATTGAATTTG
Ballchen	AAGAAAGCGGACCAGGATAAG	CTGGTATTTCCGCACAGTGA
spagetti	CATCAAGGACCGTGGAAACA	ACAGTGGTGCAATCCTTCAG
Rpn9	GAGCGAGCCATCTCCTTTAC	TCTCCATCAGTTTCTCCATGTTC
prosalpha7	GGATATGAGGACCGACGAATTG	CGCTGTCTTCGTCCTTGTT
Hel25E	AGCAGTTCAAGGACTTCCAG	CGTCCGAAACGAATGTGATTG
CG2263	CACGCTGTACGAGTTCTTCA	CCTCCACCATCTTTAGATCCAC
CG31368	CTAAAGGGCACTCTTCCTTCC	CCGTGTCGTCCACGTTTAT
eIF-2alpha	GTCGCCTACGACATCTTCAA	CCTTGAACTCTCCATCGTACTC
eIF-5B	TGCCACTACTGTTGTTTCCC	CTTCTTCTTGGCGTCCTTCTT
Ulp1	GTTGATGGCGAATGGCTTAAC	GGGAGAAGGTAATCGGAACATC
RPA2	TCAAGGCACCCGAAGTAATG	AGGCGGTGAAATCAGCTATG
BRWD3	ACCGGATGGCACAATGATAG	ATCTGCATCGACCAGGAAAG
Rtf1	CGACAGGAACAGGAAGAAGAA	GTATTGACTGGTAGCGGAACA
CG9609	CGGCAAGAATCGCCATAAGT	CCAGTTTGGATAGCCTCGAATG
CG5602	CAGTTCCTGGAGGAGTCTATCA	CAGTGAAGCCAGTTCCAATCT
NAT1	GGAGCGGAGAAGTTGGATTTA	CCTCCTCCTCATCGTAGTAGAA
mcm3	CGATAGCGATGAGGAGGATATTG	CGGCGACCATGATCTGATT
putzig	TGCAAGATCCCGAGCAAATAC	ATCCTGTCCCTGCTGGATAA
lolal	CGCTTGCAGTCCCTACTTTA	CCTTCCCGCTTTATCGAACT
Spc105R	GATCTTCGACTACCAGCGTAAAG	CGTGAAGGAAACGTCCTCAATA
26-29kD-proteinase	GTGACCTCCAACGATCCAAA	GTTCTTCACCAGCCAGTAGTC
raspberry	CGCTACTACCACAACGAGAT	CCTTCCAGTTGAGCGGAAT
Efsec	CAGGAAGAACTGCCGAAACT	ATAGCCACTTTGGATGTCTGG
Hrb87F	GTAACTTTGGAGGCGGTCAG	CGTAGCTCTGCTGGTATTCATT
eIF-2BDelta	CATCGTCTACAACGAGCTGAG	TGGCTTGATGCGGAGTATG
CG6254	TAAGACACTGAGGACACATCTC	TGGCCTACTACCCTTTACTTTG
Rootletin	AAGTCCGCTGTGAGTGAAAC	TGCACCAACTTCAGCTTATCC
CG2915	GCGGGCAAAGAGCAAATAAA	GAAGGTGTAGGCAATCGGAATA
CG1910	CCACAGAGGGCAAAGAAACA	GGGCGGTAGAAACATCAATAGG
Amun	GACGAGGAGGAGGATAAT	GGCGTTCTTCAGCTCCATATC
Otefin	CCAAGGAAGACCAGTACGAAAG	CCTCGGATACGCTGTTATCATT
D1	GACGATCAGGACGATGAGAAC	ATCTCCTTTGGTTGGTGTCC
mTTF	GCAGCACATGATCGACTACAA	GAGCGACCTCAAATCTGGTAAA
TER94	TCCAGTGCCGGAGATTACTA	GCAAAGTCTGGGCAAACATC
14-3-3 epsilon	CCGGCGAAAGCAAAGTATTC	GGCAATGGCATCATCGAAAG
CG9556	CGCAGAACCACTTGCCTAAA	GCGAATGTTACGCAGCAAATC
Nipped-B	CCGGACCAACATACTGCTAAT	TGCACCGTACTTCTTTCTGG
mrityu	CCACAAAGAGAAGATCCGAAGG	CAGCGAGCTCAGCGTTATT
PyK	GCTGATTGCGTCATGTTGTCTGGT	TGAAGCCGTTCTTCTTTCCGACCT
alpha-adaptin	ATTTGGCTGTTTCACGCTTATC	CTTACTCTTTGGCGGCTCTT
myopic	TTCCTGCGGATTTACACTGCCAAG	CAAGCCTCGCAAAGCTACCAGTTT
Bre1	GAGGAGATCCGCGAATACAAAG	CGTGGGTGGATTTGTGTATGA
mod(mdg4)	TTCTGGGACTGTTGCTTGAC	CATGGAATTGCCCACGAAATC
aub	CAAGCGCATTAATTCTCGCTAC	CTCGTATGGTTCCGCTGTAAT
eco	CTACTTCAGCGAGGAAAGCTAC	TGGTCGTAGGTGAGGAAGTTA
sle	GCTAAAGAGTTCCGATGAGGAG	CGGAATTGTGTTCGACCTTTG
Vps2	CTCCGGTTCCCTTTCCATAG	CAATCCTTGCGCAGCTTATC
MCPH1	ACTCCCGCAAAGTCTTCATC	CACTCCGTCGTATTACCAACC
alphatub67C	GGCCTGTTGCATGCTTTAC	CGTTCCAGTACGGCGATATT
axin	ATCGTGGTGTTCTCGTTCTG	CCATCGCTTTGTCTCCGAATA
ana1	GCCAGATAGGAAGATCCCTTAATC	GAGGATTGGCGAGTTTGATTTG
msn	ATGGGCTCCCAAACCATATC	CTAAATCAACCGCATGGAAACC
Acn	AAGGAGAATGAACCGCCTATC	CGTTCGTTGGAACGATTGC
Pk92B	AAGTAGACGAGCAGTTGGAGCAGT	TGTGGTAAGTGCTTGGTGGACTGT
CG32088	CTCCTGGCTGCTACGTTATATT	CTCATCCTCGGCCTGATATTT
modulo	GTAGAGAAGCCAGTTTCCAAGA	GTTGACGTATCAAAGGCAATGAG
rec	GCTAGGAAACGAGCGAGAAT	GCGAGCATAGGACAAGAACT
Plutonium	GGAACTGTTGAGGCGAAGAT	GACCATGCACTGTTTGAGTTTC
CG8223	GATCGGGCTGACCTATTTGATG	GGCCTGCATCTCTTCGATTT
cdc37	CTGTGTCAGCTCCTTCTTCTC	CGAGTCATCTTCCTCCTTCTTG
EDTP	GCCGTGCCTGTGATTATGTA	CACGTATTTCAGTGTAGCTCTCA
Cysteine proteinase-1	GAGCACCGCAAGAACTATCA	TGGAGCAATCGACCAGATTC
meiotic9	CTACGATTTCCTGCTACGTCTG	GCCATCCTGAAGCGATTGT
NUCB1	CAACAGCAGCCAGTCTATCA	GAGGACTCTGATTGTGGATCTG
CG30122	AACCGCAGAAGTGGGTATG	CGCCTACAGCGGTGTTATT
stathmin	TCCTCAGGCTAAGTGGAGAA	TCAGCGGTATCTTGAGACTTTG
CG3689	TTGAGGACACGATTGGGAAC	TGCGGCAGAGATGAGATAATG
Table S2. List of Primers
